# Supplementary material
Source: PubMed Central journal article supplement (PMC2951214)
Supplement: supp_M110.168211_jbc.M110.168211-1.pdf [file supp_M110.168211_jbc.M110.168211-1.pdf]

SUPPLEMENTARY DATA

| Compound Name | NSC #  | Structure                                                                           | MW <sup>a</sup> | % Growth Inhibition |
|---------------|--------|-------------------------------------------------------------------------------------|-----------------|---------------------|
| G6            | 33994  | 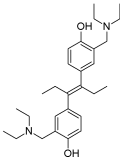   | 438.652         | 100.00              |
| D21           | 10618  |    | 227.3054        | -5.00               |
| D23           | 47911  |    | 241.3322        | -1.80               |
| D25           | 13109  |  | 379.5844        | -0.61               |
| D28           | 27647  |  | 339.4766        | 124.16              |
| D30           | 600567 |  | 384.5606        | 108.32              |

<sup>a</sup>Molecular Weight

**Table S1. Percent growth inhibition of G6 and its derivatives.** G6 and its derivatives are shown along with their NSC #, chemical structure, molecular weight and % growth inhibition. Inhibition by G6 was arbitrarily set at 100% and the inhibition potential of the other compounds relative to G6 was evaluated using the relation  $1.00 - (\Delta \text{ drug} / \Delta \text{ vehicle control})$ .

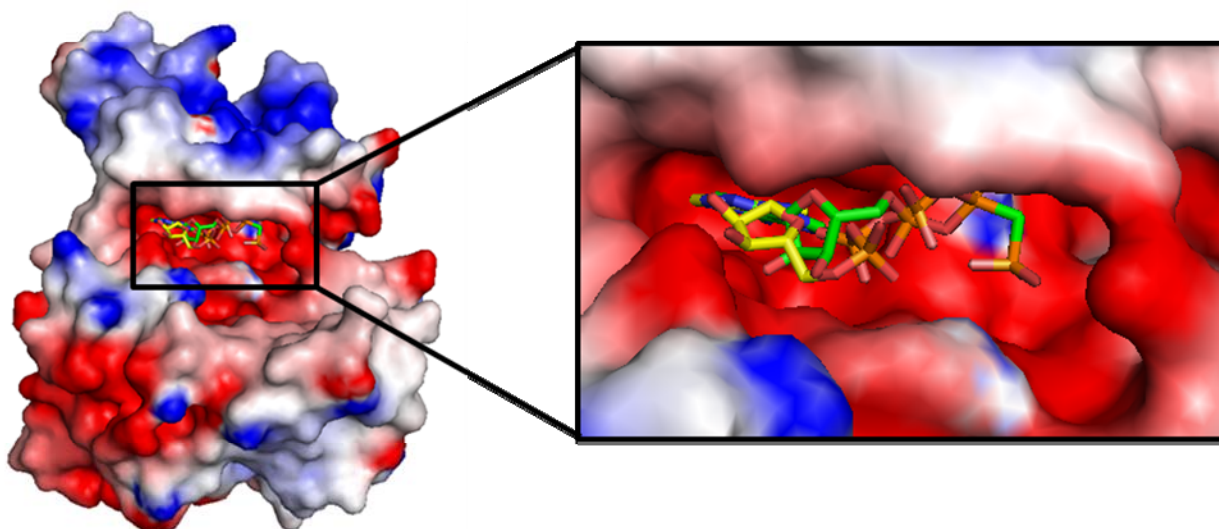

**Figure S1. Molecular surface representation of the ATP binding site of Jak2.** Molecular surface representation of Jak2 in complex with ATP and its analog ACP, shown here as stick models. ATP is colored yellow and ACP is green.
